# Supplementary material for: Polymorphic control in titanium dioxide particles
Source: Royal Society of Chemistry journal article supplement (doi:10.1039/d2na00390b), 2022-11-23
Supplement: d2na00390b1.pdf [file d2na00390b1.pdf]

*Supporting Information*

**Polymorphic Control in Titanium Dioxide Particles**

*Gabriel Quiñones Vélez<sup>a,b</sup>, Diego Soto Nieves<sup>a,b</sup>, Anushka Castro Vázquez<sup>b,c</sup>  
and Vilmali López-Mejías<sup>a,b,\*</sup>*

<sup>a</sup> Department of Chemistry, University of Puerto Rico, Río Piedras  
San Juan, Puerto Rico, 00931 United States.

<sup>b</sup> Crystallization Design Institute, Molecular Sciences Research Center,  
University of Puerto Rico, San Juan, Puerto Rico, 00926 United States.

<sup>c</sup> Department of Accounting, University of Puerto Rico, Río Piedras  
San Juan, Puerto Rico, 00931 United States.

[\\*vilmali.lopez@upr.edu](mailto:*vilmali.lopez@upr.edu)

**Table of content.**

**S 1. Bulk Syntheses of TiO<sub>2</sub> particles**

S 1.1. Syntheses

S 1.2. Particle Size Distribution of Bulk Material

S 1.3. Micro-powder X-ray Diffraction of Bulk Material

**S 2. Phase Inversion Temperature (PIT) Determination**

**S 3. Particle Size Distribution of Amorphous TiO<sub>2</sub> Particles**

**S 4. Raman Vibrational Spectroscopy**

**S 5. Micro-powder X-ray Diffraction (PXRD)**

**S 6. Comparison of Experimental Conditions for TiO<sub>2</sub> Brookite Syntheses**

**S 7. Size Comparison of the Synthesized TiO<sub>2</sub> Particles by Different Methods**

**S 8. References**

## 1. Bulk Syntheses of TiO<sub>2</sub> Particles

### 1.1. Syntheses.

#### *Bulk Synthesis of Rutile Phase TiO<sub>2</sub>*

A mixture of H<sub>2</sub>O:HNO<sub>3</sub> was prepared separately by diluting 6 mL of nitric acid in 100 mL of nanopure water. In a glass container, 50mL of the H<sub>2</sub>O:HNO<sub>3</sub> solution were added and heated in a hot plate at 35°C for 15 min. In another container, the titanium (IV) precursor solution was prepared by mixing 15 mL of ethanol, 5 mL of glacial acetic acid and 5 mL of titanium (IV) isopropoxide. The titanium (IV) precursor solution was added to the H<sub>2</sub>O:HNO<sub>3</sub> mixture and stirred at 350 rpm. Here, the glass container was sealed with aluminum foil to prevent evaporation. The resulting mixture was heated at 70°C for 75 min.

#### *Bulk Synthesis of Anatase Phase TiO<sub>2</sub>*

A mixture of H<sub>2</sub>O:NaOH was prepared separately by diluting 6 mL of NaOH 1.0 M in 100 mL of nanopure water. In a glass container, 50mL of the H<sub>2</sub>O:NaOH solution were added and heated in a hot plate at 35°C for 15 min. In a separate container, the titanium (IV) precursor solution was prepared by mixing 15 mL of ethanol, 5 mL of glacial acetic acid and 5 mL of titanium (IV) isopropoxide. The titanium (IV) precursor solution was added to the H<sub>2</sub>O:NaOH mixture and stirred at 350 rpm. Here, the glass container was sealed with aluminum foil to prevent evaporation. The resulting mixture was heated at 70°C for 75 min.

#### *Bulk Synthesis of Brookite Phase TiO<sub>2</sub>*

For the brookite phase TiO<sub>2</sub> bulk synthesis as control, the experimental procedure reported by Mamakhel *et al.* was followed.<sup>1</sup>

### 1.2. Particle Size Determination of the Bulk Material.

Samples were prepared by taking 50 µL aliquots of the resultant suspension presumed to contain the bulk amorphous TiO<sub>2</sub>. They were transferred in disposable polystyrene cuvettes (REF: 67.754, 10 x 10 x 45 mm, Sarsted, Germany) and diluted with nanopure water in a 1:40 ratio. The cuvettes containing the samples remained undisturbed near the Zetasizer for 30 min prior to the measurements. Afterwards, size measurements were performed after 2 min of sample equilibration inside the instrument at room temperature (25°C).

Tables S1.2.1-S1.2.3 summarize the DLS parameters and values for the three different bulk syntheses products in nanopure water. Figures S1.2.1-S1.2.3 depict the DLS spectra showing the particle size distribution of amorphous TiO<sub>2</sub> particles from the three respective bulk syntheses.

**Table S1.2.1.** Dynamic light scattering parameters and values after analyzing the product from the bulk synthesis employing H<sub>2</sub>O:HNO<sub>3</sub>.

| <b>Bulk Synthesis employing H<sub>2</sub>O:HNO<sub>3</sub></b> |             |             |               |       |
|----------------------------------------------------------------|-------------|-------------|---------------|-------|
| Run                                                            | Size (d.nm) | % Intensity | St Dev (d.nm) | PDI   |
| 1                                                              | 40.40       | 75.7        | 17.33         | 0.468 |
|                                                                | 681.9       | 24.3        | 370.4         |       |
|                                                                | 0.000       | 0.0         | 0.000         |       |
| 2                                                              | 38.78       | 74.3        | 16.25         | 0.485 |
|                                                                | 521.4       | 21.6        | 233.2         |       |
|                                                                | 4533        | 4.1         | 870.3         |       |
| 3                                                              | 41.89       | 79.1        | 22.09         | 0.470 |
|                                                                | 408.1       | 16.6        | 178.8         |       |
|                                                                | 4667        | 4.3         | 804.0         |       |
| Average                                                        | 40.39       | 76.4        | 18.84         | 0.474 |
|                                                                | 553.9       | 20.8        | 305.0         |       |
|                                                                | 4579        | 2.8         | 865.5         |       |

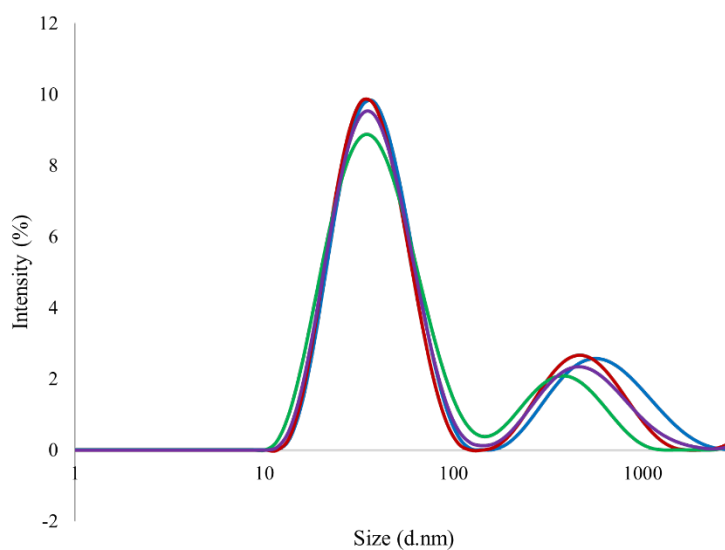

**Figure S1.2.1.** DLS spectra showing particle size distribution for each run (red, blue and green) and average size values of 40.39 and 533.9 d.nm (purple).

**Table S1.2.2.** Dynamic light scattering parameters and values after analyzing the product from the bulk synthesis employing H<sub>2</sub>O:NaOH

| <b>Bulk Synthesis employing H<sub>2</sub>O:NaOH</b> |             |             |               |       |
|-----------------------------------------------------|-------------|-------------|---------------|-------|
| Run                                                 | Size (d.nm) | % Intensity | St Dev (d.nm) | PDI   |
| 1                                                   | 1444        | 100.0       | 170.8         | 0.536 |
|                                                     | 0.000       | 0.0         | 0.000         |       |
|                                                     | 0.000       | 0.0         | 0.000         |       |
| 2                                                   | 1984        | 100.0       | 308.2         | 0.393 |
|                                                     | 0.000       | 0.0         | 0.000         |       |
|                                                     | 0.000       | 0.0         | 0.000         |       |
| 3                                                   | 1470        | 100.0       | 156.9         | 0.581 |
|                                                     | 0.000       | 0.0         | 0.000         |       |
|                                                     | 0.000       | 0.0         | 0.000         |       |
| Average                                             | 1633        | 100.0       | 333.9         | 0.503 |
|                                                     | 0.000       | 0.0         | 0.000         |       |
|                                                     | 0.000       | 0.0         | 0.000         |       |

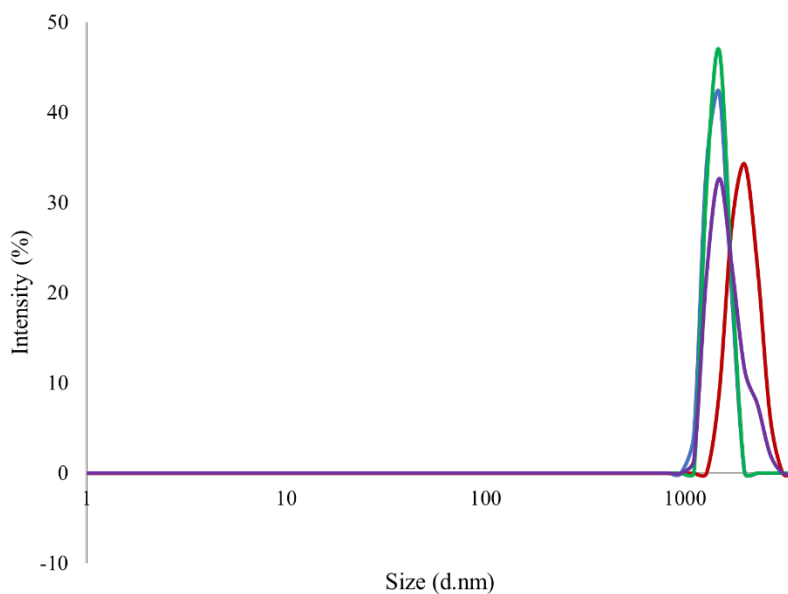

**Figure S1.2.2.** DLS spectra showing particle size distribution (d. nm) for each run (red, blue and green) and average size values of 1633 d.nm (purple).

**Table S1.2.3.** Dynamic light scattering parameters and values after analyzing the product from the bulk synthesis employing H<sub>2</sub>O:IPA

| <b>Bulk Synthesis employing H<sub>2</sub>O:IPA</b> |             |             |               |       |
|----------------------------------------------------|-------------|-------------|---------------|-------|
| Run                                                | Size (d.nm) | % Intensity | St Dev (d.nm) | PDI   |
| 1                                                  | 42.99       | 78.0        | 28.03         | 0.530 |
|                                                    | 297.9       | 17.1        | 121.8         |       |
|                                                    | 4965        | 4.9         | 629.3         |       |
| 2                                                  | 45.17       | 84.9        | 29.98         | 0.468 |
|                                                    | 355.6       | 11.0        | 151.5         |       |
|                                                    | 4663        | 4.2         | 805.5         |       |
| 3                                                  | 40.21       | 80.2        | 23.17         | 0.377 |
|                                                    | 277.2       | 16.5        | 122.3         |       |
|                                                    | 4880        | 3.3         | 687.3         |       |
| Average                                            | 42.92       | 81.1        | 26.92         | 0.458 |
|                                                    | 305.9       | 14.8        | 132.5         |       |
|                                                    | 4841        | 4.1         | 720.3         |       |

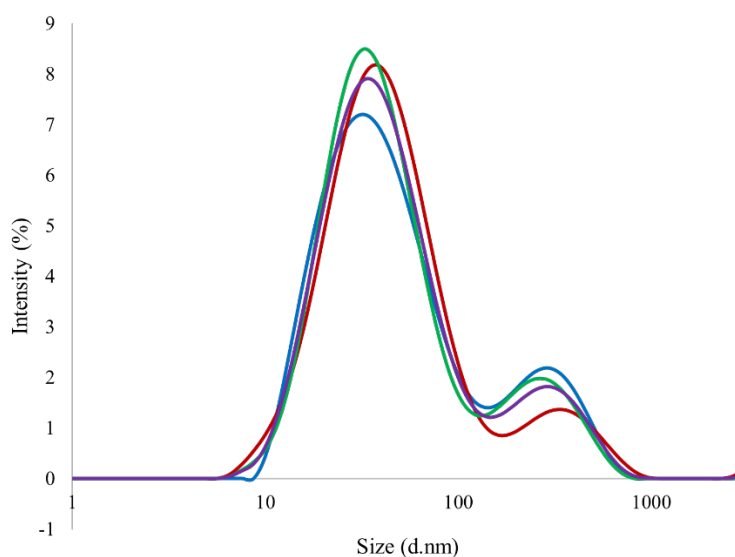

**Figure S1.2.3.** DLS spectra showing particle size distribution (d. nm) for each run (red, blue and green) and an average size value of 42.92 and 305.9 d.nm (purple).

### 1.3. Micro-powder X-ray Diffraction of Bulk Material.

Figures S1.3.1 depict an overlay of the experimental powder pattern of the TiO<sub>2</sub> particles obtained through the bulk syntheses without thermal treatment, with the spectra of the three standards rutile (ICSD 165920)<sup>2</sup>, anatase (ICSD 154601)<sup>3</sup>, and brookite (ICSD 154605)<sup>3</sup>. Figure S1.3.2 depict an overlay of the experimental powder pattern of the TiO<sub>2</sub> particles obtained through the bulk syntheses and thermally treated with the respective standards.

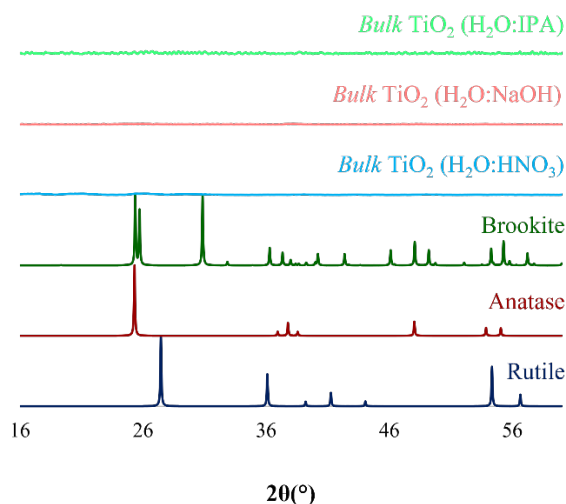

**Figure 1.3.1.** PXRD overlay of simulated rutile (ICSD 165920, navy blue)<sup>2</sup>, anatase (ICSD 154601, dark red)<sup>3</sup>, and brookite (ICSD 154605, dark green)<sup>3</sup> phases, with the diffractograms of the TiO<sub>2</sub> particles synthesized through the bulk syntheses without thermal treatment, employing H<sub>2</sub>O:HNO<sub>3</sub> (light blue), H<sub>2</sub>O:NaOH (light red), and H<sub>2</sub>O:IPA (light green) conditions.

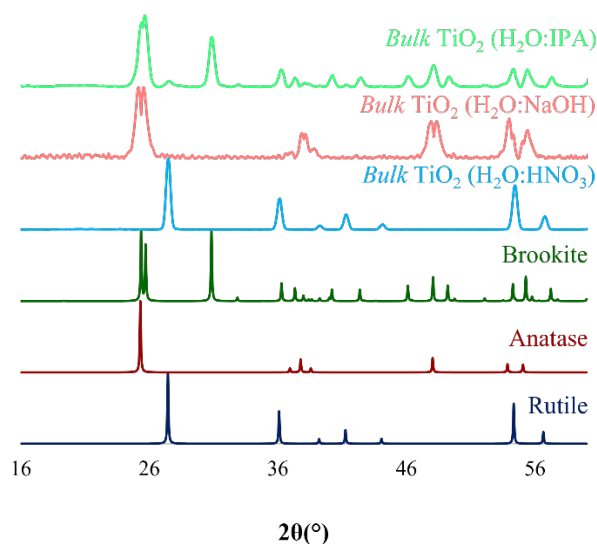

**Figure 1.3.1.** PXRD overlay of simulated rutile (ICSD 165920, navy blue)<sup>2</sup>, anatase (ICSD 154601, dark red)<sup>3</sup>, and brookite (ICSD 154605, dark green)<sup>3</sup> phases, with the diffractograms of the TiO<sub>2</sub> particles synthesized through the bulk syntheses after thermal treatment, employing H<sub>2</sub>O:HNO<sub>3</sub> (light blue), H<sub>2</sub>O:NaOH (light red), and H<sub>2</sub>O:IPA (light green) conditions.

## 2. Phase Inversion Temperature (PIT) Determination

For the  $\text{H}_2\text{O}:\text{HNO}_3/\text{Heptane}$  and  $\text{H}_2\text{O}:\text{NaOH}/\text{Heptane}$  emulsion systems, the PIT was determined as follows. The respective mixture (respective aqueous phase, heptane and BrijL4®) was homogenized using an IKA T10 Basic Ultra Turrax (IKA Works Inc., Wilmington, NC), for 30 sec at a speed of “4” (14,450 rpm equivalent). The vial was situated in a jacketed beaker, with a 20.3 cm (8”) stainless steel RTD temperature probe (VWR®, VWR International). The conductivity of the emulsion was measured with a Fisherbrand Accumet BasicAB30 conductivity meter (Fisher Scientific UK, Loughborough, UK). The bath temperature was controlled with a Julabo F32-ME Refrigerated/Heating Circulator (JULABO GmbH, Seelbach, Germany). Both the vial and the bath contained magnetic stir bars stirring at 300 rpm using a VWR® Professional Hot Plate Stirrer (97042-714, VWR®, VWR International). The temperature of the emulsion was allowed to reach 2°C in the bath before starting the measurements. The temperature profile started at 2°C and ended at 37°C at a heating rate of 1°C/min. The conductivity of the respective mixture was recorded in 1-degree intervals. Figure S2.1-2.2 depicts the PIT determination curves for the  $\text{H}_2\text{O}:\text{HNO}_3/\text{Heptane}$  and  $\text{H}_2\text{O}:\text{NaOH}/\text{Heptane}$  emulsion systems, respectively.

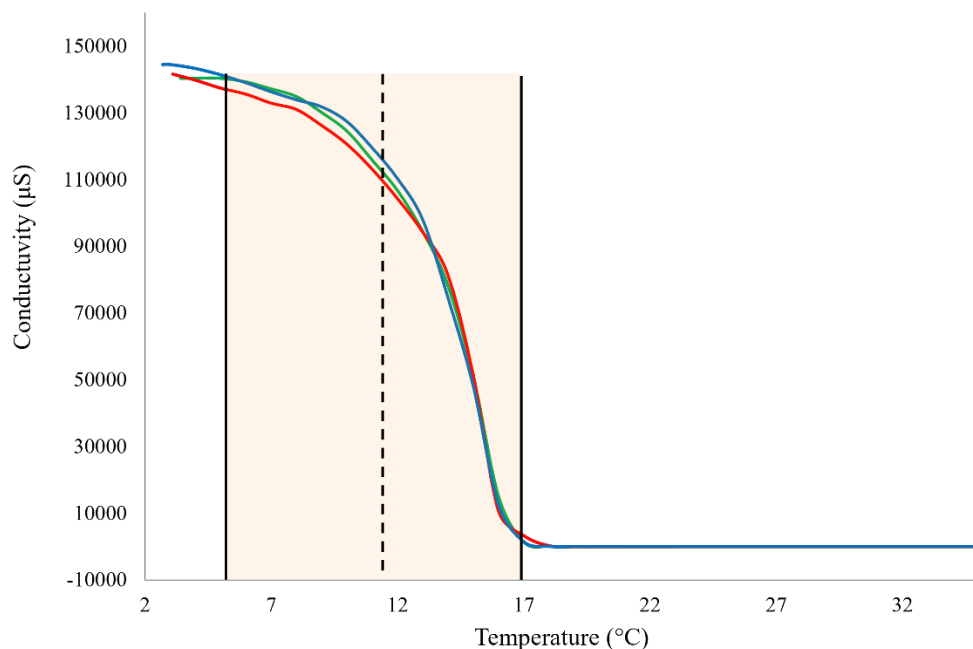

**Figure S2.1.** Nano-emulsion PIT determination of the  $\text{H}_2\text{O}:\text{HNO}_3/\text{Heptane}$  emulsion system, showing the phase inversion occurs at approximately  $\sim 11^\circ\text{C}$  (dashed line). Depicted by the light orange region is the range for the phase inversion which starts at  $5^\circ\text{C}$  and ends at  $17^\circ\text{C}$ .

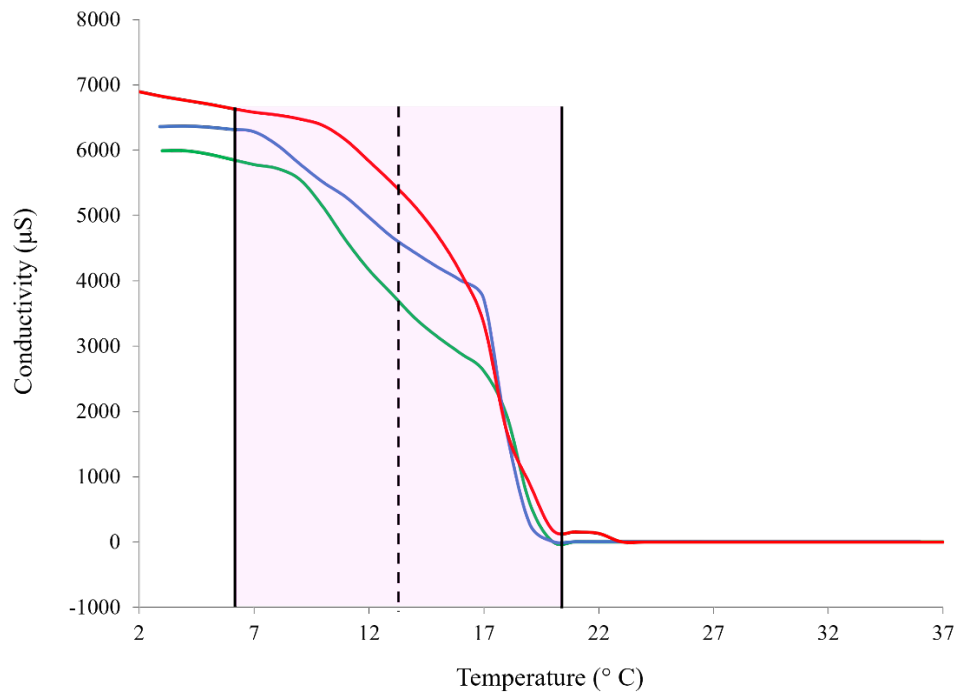

**Figure S2.2.** Nano-emulsion PIT determination of the H<sub>2</sub>O:NaOH/Heptane emulsion system, showing the phase inversion occurs at approximately ~ 13°C (dashed line). Depicted by the light pink region is the range for the phase inversion which starts at 6°C and ends at 20°C.



### 3. Particle Size Distribution of Amorphous TiO<sub>2</sub> Particles

Samples were prepared by taking 50 µL aliquots of the supernatant from the respective PIT-nano-emulsion synthesis aqueous phase. They were transferred in disposable polystyrene cuvettes (REF: 67.754, 10 x 10 x 45 mm, Sarsted, Germany) and diluted with nanopure water in a 1:40 ratio. The cuvettes containing the samples remained undisturbed near the Zetasizer for 30 min prior to the measurements. Afterwards, size measurements were performed after 2 min of sample equilibration inside the instrument at room temperature (25°C).

Tables S3.1-S3.3 summarize the DLS parameters and values for the three different PIT-nano-emulsion syntheses products in nanopure water. Figures S3.1-S3.3 depict the DLS spectra showing the particle size distribution of amorphous TiO<sub>2</sub> nanoparticles from the three respective PIT-nano-emulsion syntheses.

**Table S3.1.** Dynamic light scattering parameters and values after analyzing the PIT-nano-emulsion synthesis product employing the H<sub>2</sub>O:HNO<sub>3</sub>/Heptane emulsion system.

| Emulsion System: H <sub>2</sub> O:HNO <sub>3</sub> /Heptane |             |             |               |       |
|-------------------------------------------------------------|-------------|-------------|---------------|-------|
| Run                                                         | Size (d.nm) | % Intensity | St Dev (d.nm) | PDI   |
| 1                                                           | 138.3       | 82.6        | 70.81         | 0.489 |
|                                                             | 21.78       | 16.2        | 7.538         |       |
|                                                             | 4795        | 1.2         | 726.5         |       |
| 2                                                           | 140.3       | 86.3        | 74.65         | 0.476 |
|                                                             | 18.73       | 13.7        | 5.479         |       |
|                                                             | 0.000       | 0.0         | 0.000         |       |
| 3                                                           | 152.6       | 83.4        | 85.43         | 0.493 |
|                                                             | 22.41       | 16.6        | 7.844         |       |
|                                                             | 0.000       | 0.0         | 0.000         |       |
| Average                                                     | 142.5       | 85.0        | 77.93         | 0.486 |
|                                                             | 20.03       | 14.6        | 6.103         |       |
|                                                             | 4795        | 0.4         | 726.5         |       |

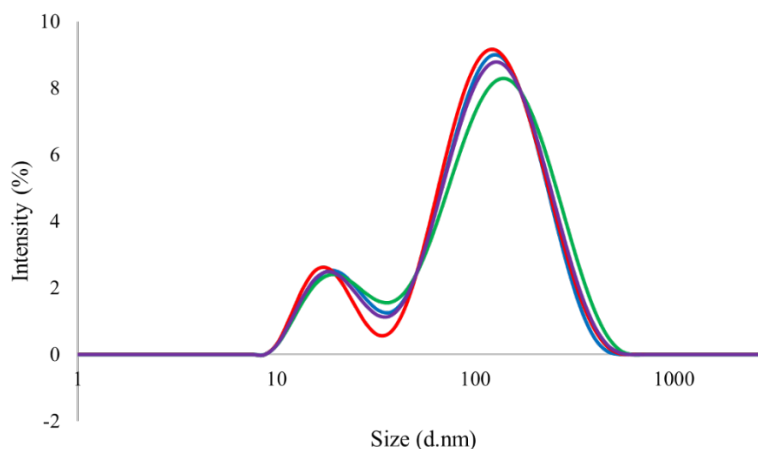

**Figure S3.1.** DLS spectra showing particle size distribution for each run (red, blue and green) and average size values of 142.5 and 20.03 d.nm (purple).

**Table S3.2.** Dynamic light scattering parameters and values after analyzing the PIT-nano-emulsion synthesis product employing the H<sub>2</sub>O:NaOH/Heptane emulsion system.

| Emulsion System: H <sub>2</sub> O:NaOH/Heptane |             |             |               |       |
|------------------------------------------------|-------------|-------------|---------------|-------|
| Run                                            | Size (d.nm) | % Intensity | St Dev (d.nm) | PDI   |
| 1                                              | 431.6       | 61.2        | 121.9         | 0.571 |
|                                                | 73.34       | 37.5        | 18.89         |       |
|                                                | 5560        | 1.3         | 0.000         |       |
| 2                                              | 445.8       | 57.5        | 111.4         | 0.348 |
|                                                | 76.88       | 42.5        | 18.21         |       |
|                                                | 0.000       | 0.0         | 0.000         |       |
| 3                                              | 520.0       | 57.3        | 159.5         | 0.539 |
|                                                | 88.95       | 41.6        | 26.28         |       |
|                                                | 5560        | 1.1         | 0.000         |       |
| Average                                        | 465.0       | 58.7        | 137.9         | 0.486 |
|                                                | 79.92       | 40.5        | 22.51         |       |
|                                                | 5560        | 0.8         | 6.104e-5      |       |

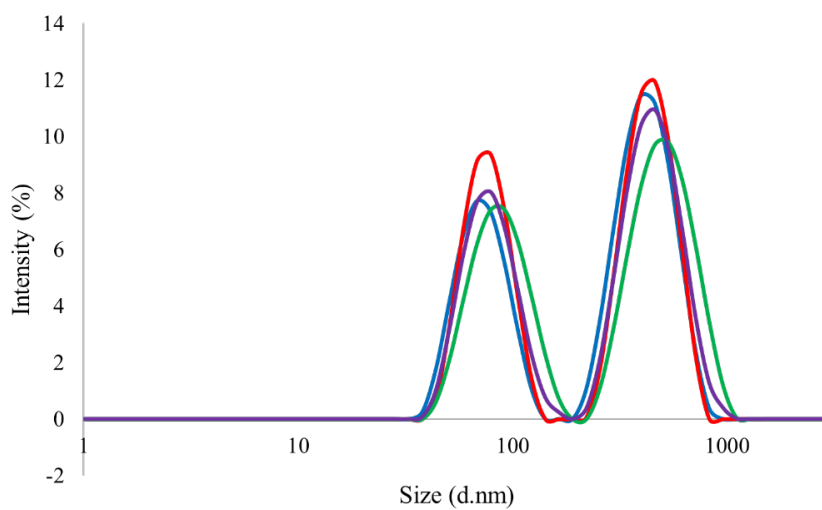

**Figure S3.2.** DLS spectra showing particle size distribution (d. nm) for each run (red, blue and green) and average size values of 465.0 and 79.92 d.nm (purple).

**Table S3.3.** Dynamic light scattering parameters and values after analyzing the PIT-nano-emulsion synthesis product employing the H<sub>2</sub>O:IPA/Heptane emulsion system.

| Emulsion System: H <sub>2</sub> O:IPA/Heptane |             |             |               |       |
|-----------------------------------------------|-------------|-------------|---------------|-------|
| Run                                           | Size (d.nm) | % Intensity | St Dev (d.nm) | PDI   |
| 1                                             | 66.95       | 93.0        | 39.34         | 0.385 |
|                                               | 4687        | 7.0         | 791.7         |       |
|                                               | 0.000       | 0.0         | 0.000         |       |
| 2                                             | 70.28       | 95.5        | 53.94         | 0.344 |
|                                               | 5225        | 4.1         | 459.9         |       |
|                                               | 8.461       | 0.4         | 1.329         |       |
| 3                                             | 65.86       | 97.6        | 35.84         | 0.336 |
|                                               | 5357        | 2.4         | 340.3         |       |
|                                               | 0.000       | 0.0         | 0.000         |       |
| Average                                       | 67.61       | 95.5        | 43.80         | 0.355 |
|                                               | 4971        | 4.5         | 704.7         |       |
|                                               | 0.000       | 0.0         | 0.000         |       |

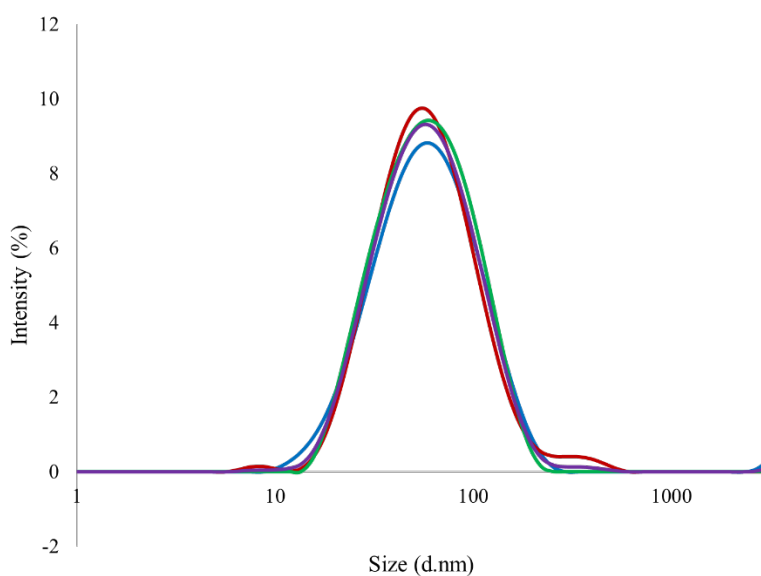

**Figure S3.3.** DLS spectra showing particle size distribution (d. nm) for each run (red, blue and green) and an average size value of 67.61 d.nm (purple).

#### 4. Raman Vibration Spectroscopy

Figures S4.1-S4.3 depict an overlay of the experimental Raman spectra of the  $\text{TiO}_2$  particles obtained through the PIT-nano-emulsion synthesis and thermally treated, with the spectra of the three standards (rutile, anatase and brookite). Figure S4.4 depict an overlay of the experimental Raman spectra of the  $\text{TiO}_2$  particles obtained through the PIT-nano-emulsion method without being thermally treated.

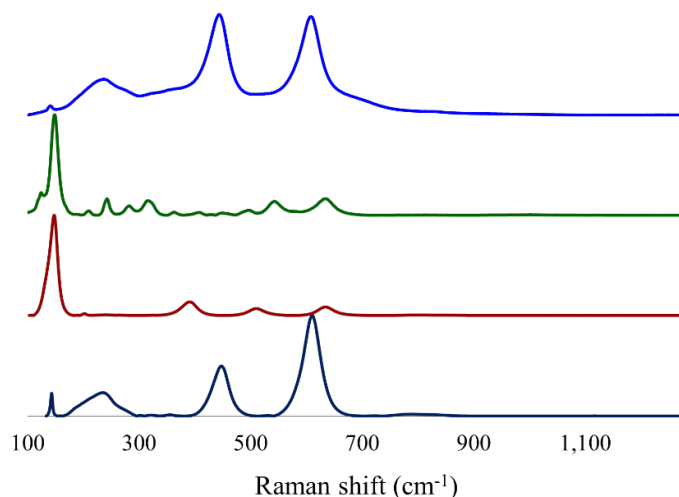

**Figure S4.1.** Raman spectra overlay of rutile (navy blue), anatase (dark red), and brookite (dark green) standards, and the  $\text{TiO}_2$  particles employing the  $\text{H}_2\text{O}:\text{HNO}_3/\text{Heptane}$  system and calcinated at  $850^\circ\text{C}$  (blue).

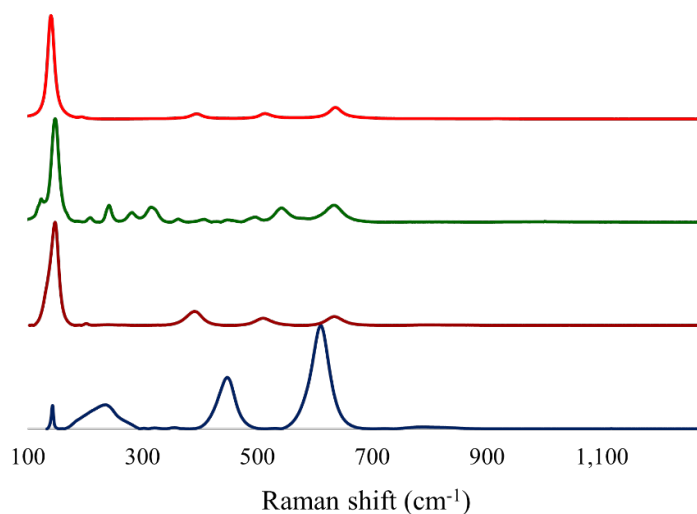

**Figure S4.2.** Raman spectra overlay of rutile (navy blue), anatase (dark red), and brookite (dark green) standards, and the  $\text{TiO}_2$  particles employing the  $\text{H}_2\text{O}:\text{NaOH}/\text{Heptane}$  system and calcinated at  $400^\circ\text{C}$  (red).

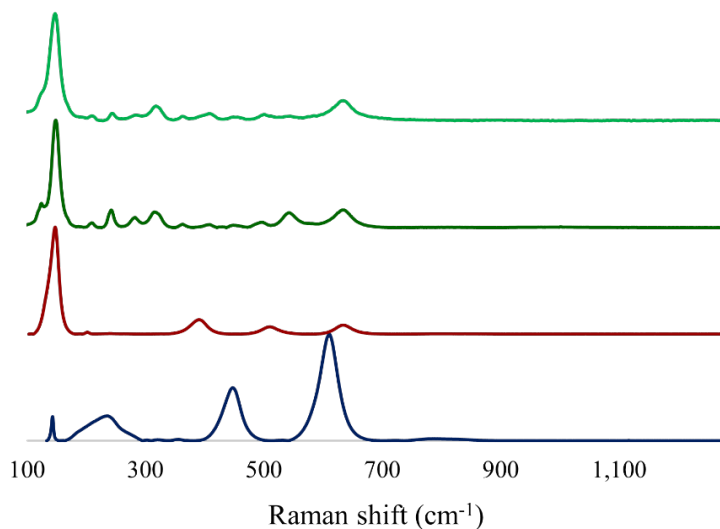

**Figure S4.3.** Raman spectra overlay of rutile (navy blue), anatase (dark red), and brookite (dark green) standards, and the TiO<sub>2</sub> nanoparticles employing the H<sub>2</sub>O:IPA/Heptane system and thermally treated at 200°C (green).

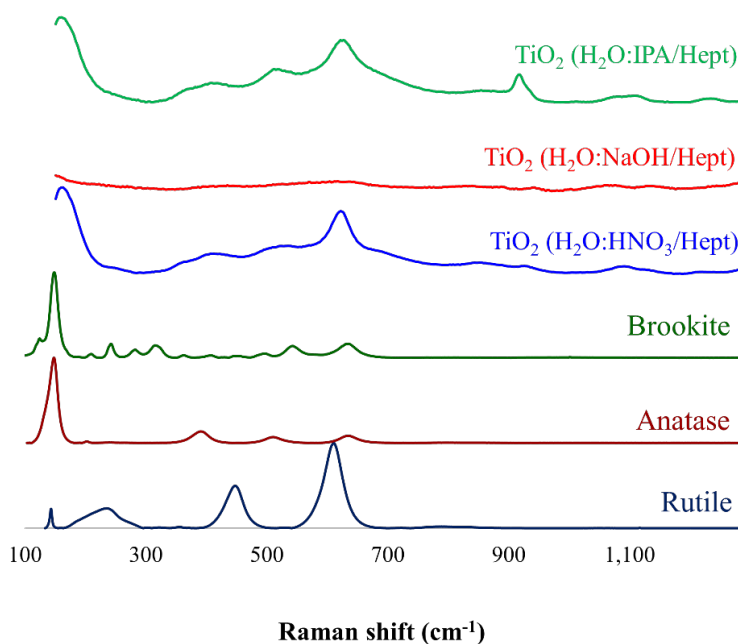

**Figure S4.4.** Raman spectra overlay of simulated rutile (navy blue), anatase (dark red), and brookite (dark green) phases, with the spectra of the TiO<sub>2</sub> particles synthesized through the PIT-nano-emulsion method without thermal treatment, employing H<sub>2</sub>O:HNO<sub>3</sub>/Heptane (blue), H<sub>2</sub>O:NaOH/Heptane (red), and H<sub>2</sub>O:IPA/Heptane (green) emulsion systems.

## 5. Micro-powder X-ray Diffraction (PXRD)

Figures S5.1-S5.3 depict an overlay of the experimental powder pattern of the TiO<sub>2</sub> particles obtained through the PIT-nano-emulsion synthesis and thermally treated, with the spectra of the three standards rutile (ICSD 165920)<sup>2</sup>, anatase (ICSD 154601)<sup>3</sup>, and brookite (ICSD 154605)<sup>3</sup>. Figure S5.4 depict an overlay of the experimental powder pattern of the TiO<sub>2</sub> particles obtained through the PIT-nano-emulsion method without being thermally treated. Figure S5.5 depict a comparison between overlaid experimental powder pattern of TiO<sub>2</sub> particles obtained employing H<sub>2</sub>O:IPA/Heptane and H<sub>2</sub>O:NaOH/Heptane, both calcinated at 200°C. Figure S5.6 depict a comparison between overlaid experimental powder pattern of TiO<sub>2</sub> particles obtained employing H<sub>2</sub>O: HNO<sub>3</sub>/Heptane and H<sub>2</sub>O:NaOH/Heptane, both calcinated at 400°C.

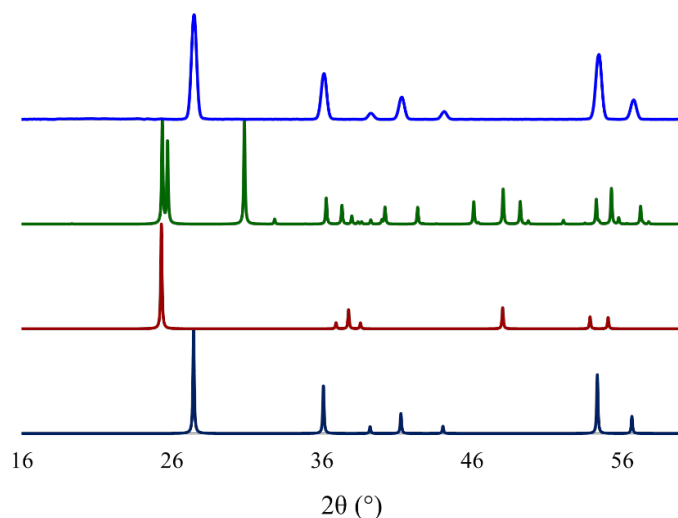

**Figure S5.1.** Powder X-ray diffractogram overlay of rutile (ICSD 165920, navy blue)<sup>2</sup>, anatase (ICSD 154601, dark red)<sup>3</sup>, and brookite (ICSD 154605, dark green)<sup>3</sup> standards, and the TiO<sub>2</sub> particles employing the H<sub>2</sub>O:HNO<sub>3</sub>/Heptane system and calcinated at 850°C (blue).

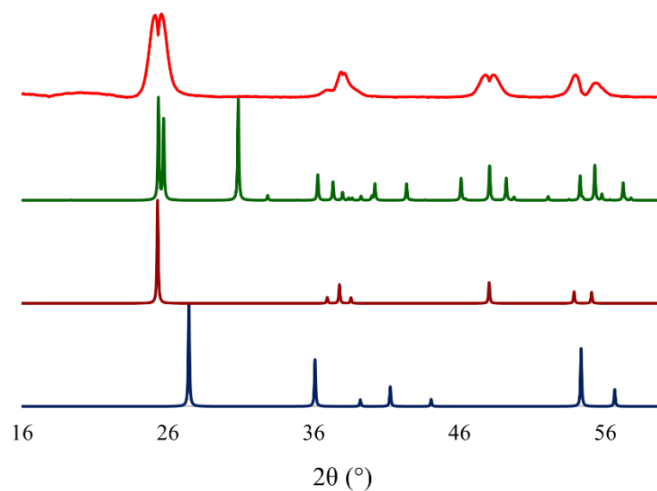

**Figure S5.2.** Powder X-ray diffractogram overlay of rutile (ICSD 165920, navy blue)<sup>2</sup>, anatase (ICSD 154601, dark red)<sup>3</sup>, and brookite (ICSD 154605, dark green)<sup>3</sup> standards, and the TiO<sub>2</sub> particles employing the H<sub>2</sub>O:NaOH/Heptane system and calcinated at 400°C (red).

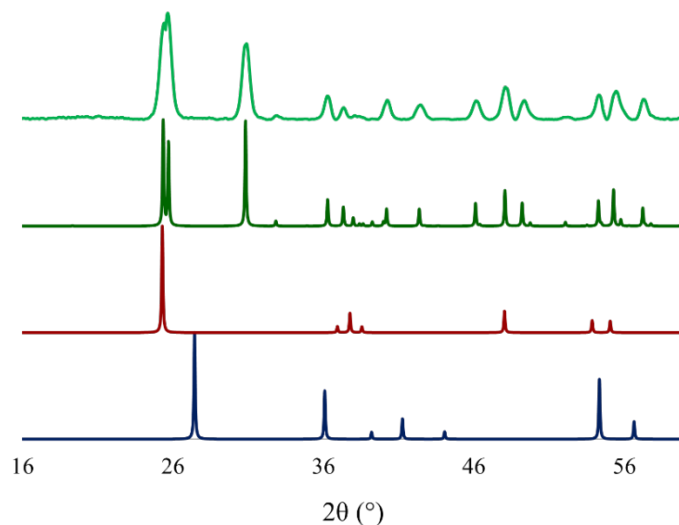

**Figure S5.3.** Powder X-ray diffractogram overlay of rutile (ICSD 165920, navy blue)<sup>2</sup>, anatase (ICSD 154601, dark red)<sup>3</sup>, and brookite (ICSD 154605, dark green)<sup>3</sup> standards, and the TiO<sub>2</sub> nanoparticles employing the H<sub>2</sub>O:IPA/Heptane system and thermally treated at 200°C (green).

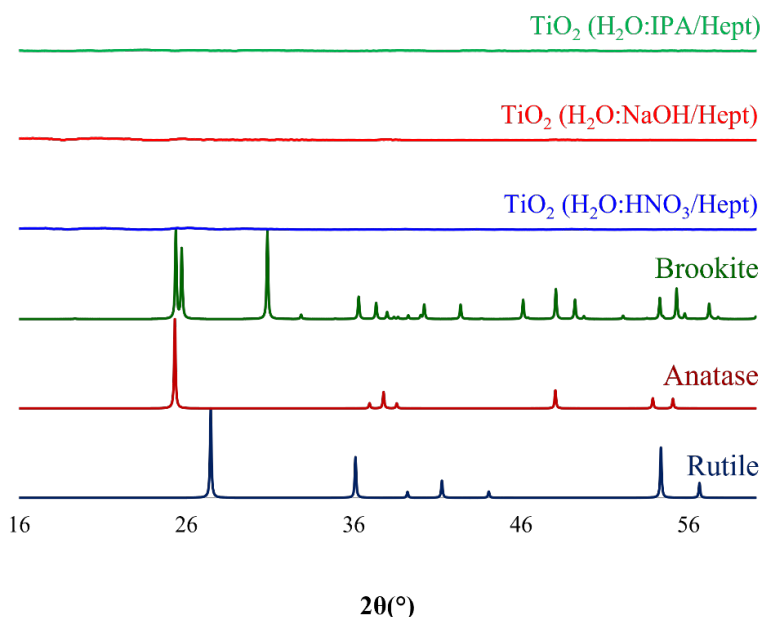

**Figure 5.4.** PXRD overlay of simulated rutile (ICSD 165920, navy blue)<sup>2</sup>, anatase (ICSD 154601, dark red)<sup>3</sup>, and brookite (ICSD 154605, dark green)<sup>3</sup> phases, with the diffractograms of the TiO<sub>2</sub> particles synthesized through the PIT-nano-emulsion method without thermal treatment, employing H<sub>2</sub>O:HNO<sub>3</sub>/Heptane (blue), H<sub>2</sub>O:NaOH/Heptane (red), and H<sub>2</sub>O:IPA/Heptane (green) emulsion systems.

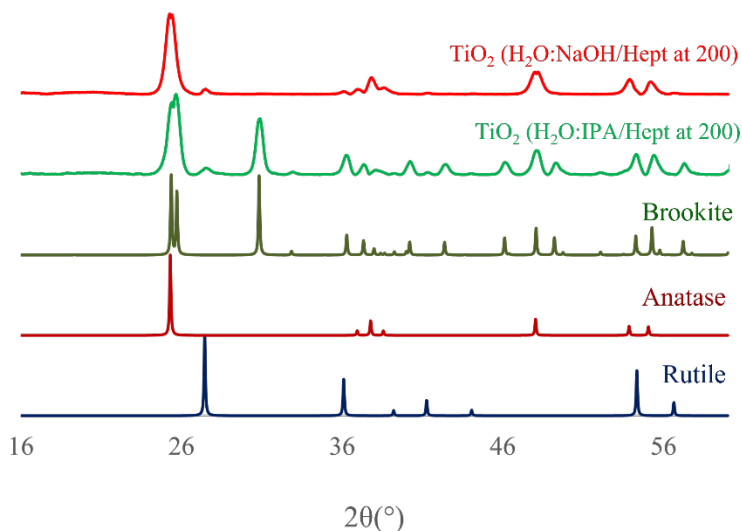

**Figure S5.5.** Powder X-ray diffractogram overlay of rutile (ICSD 165920, navy blue)<sup>2</sup>, anatase (ICSD 154601, dark red)<sup>3</sup>, and brookite (ICSD 154605, dark green)<sup>3</sup> standards, and the TiO<sub>2</sub> particles employing the H<sub>2</sub>O:IPA/Heptane (green) and H<sub>2</sub>O:NaOH/Heptane (red) systems, both calcinated at 200°C.



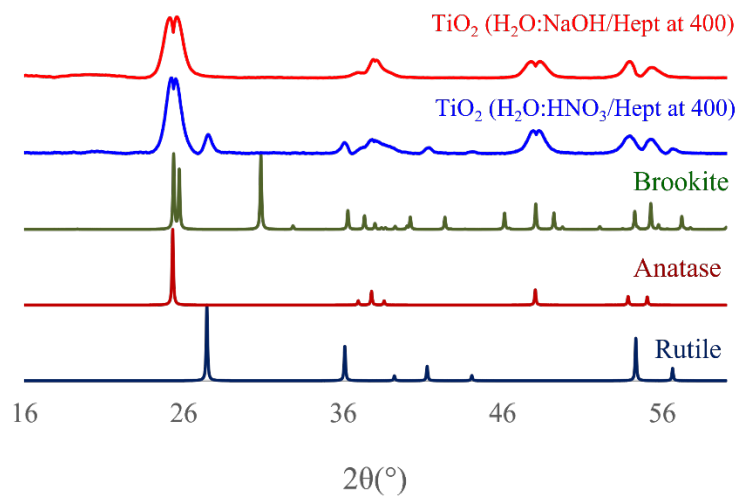

**Figure S5.6.** Powder X-ray diffractogram overlay of rutile (ICSD 165920, navy blue)<sup>2</sup>, anatase (ICSD 154601, dark red)<sup>3</sup>, and brookite (ICSD 154605, dark green)<sup>3</sup> standards, and the  $\text{TiO}_2$  particles employing the  $\text{H}_2\text{O}:\text{HNO}_3/\text{Heptane}$  (blue) and  $\text{H}_2\text{O}:\text{NaOH}/\text{Heptane}$  (red) systems, both calcinated at  $400^\circ\text{C}$ .

## 6. Comparison of Experimental Conditions for TiO<sub>2</sub> Brookite Syntheses

Table S6.1 summarizes the experimental conditions and parameters employed during the brookite-phase oriented PIT-nano-emulsion synthesis as an example, and compared with other reported methods.<sup>1,4,5</sup>

**Table S6.1.** Comparison of the experimental conditions and parameters employed to isolate brookite phase TiO<sub>2</sub> nanoparticles among the PIT-nano-emulsion synthesis and other reported methods.

| Methods                               | Starting materials                                                                                                  | Total quantity of reagents | Synthesis temperature | Synthesis time | Thermal treatment temperature | Thermal treatment time |
|---------------------------------------|---------------------------------------------------------------------------------------------------------------------|----------------------------|-----------------------|----------------|-------------------------------|------------------------|
| PIT-nano-emulsion synthesis           | Water, Heptane, Brij L4®, titanium (IV) isopropoxide, IPA, glycolic acid, NH <sub>4</sub> OH                        | 0.9-5 mL                   | 35-70°C               | 75 min         | 200°C                         | 20 h                   |
| Mamakhel, <i>et. al.</i> <sup>1</sup> | Water, IPA, [titanium (IV) isopropoxide, -butoxide, -tetrachloride, -oxysulfate], glycolic acid, NH <sub>4</sub> OH | 5-50 mL                    | 90-200°C              | 25 h           | 200°C                         | 20 h                   |
| Kolesnik, <i>et. al.</i> <sup>4</sup> | Water, lactic acid, titanium (IV) butoxide, urea, EtOH                                                              | 10-60 mL                   | 180°C                 | 48 h           | 180°C                         | 48 h                   |
| Pottier, <i>et. al.</i> <sup>5</sup>  | Titanium (IV) tetrachloride, HCl, HClO <sub>4</sub> , NaCl, HNO <sub>3</sub>                                        | 1-150 mL                   | 100°C                 | 48 h-1 month   | 100°C                         | 48 h-1 month           |

## 7. Size Comparison of the Synthesized TiO<sub>2</sub> Particles by Different Methods

Table S7.1 summarizes the particle size of the experimental rutile, anatase and brookite phase TiO<sub>2</sub> particles obtained from the PIT-nano-emulsion syntheses, determined by scanning electron microscopy (SEM), DLS, as well as the resulting crystallite size determined the Debye-Scherrer equation.

**Table S7.1.** Comparison of the average particle size of the products before and after calcination of the TiO<sub>2</sub> particles as determined by DLS and SEM-EDS as well as the resulting crystallite size determined using the Debye-Scherrer equation.

| Resulting Polymorph | Average particle size by DLS (d.nm) | Average particle size by SEM (nm) | Average crystallite size determined by the Debye-Scherrer Equation |        |                           |
|---------------------|-------------------------------------|-----------------------------------|--------------------------------------------------------------------|--------|---------------------------|
|                     |                                     |                                   | 2θ (°)                                                             | τ (nm) | τ <sub>Average</sub> (nm) |
| Rutile              | 142.50                              | ~350                              | 27.41                                                              | 16.75  | 17.93                     |
|                     |                                     |                                   | 36.22                                                              | 19.85  |                           |
|                     |                                     |                                   | 41.44                                                              | 16.43  |                           |
|                     |                                     |                                   | 54.52                                                              | 18.67  |                           |
| Anatase             | 465.00                              | ~480                              | 25.39                                                              | 9.8    | 10.09                     |
|                     |                                     |                                   | 38.06                                                              | 7.8    |                           |
|                     |                                     |                                   | 47.83                                                              | 8.4    |                           |
|                     |                                     |                                   | 54.09                                                              | 14.34  |                           |
| Brookite            | 67.61                               | ~75                               | 25.74                                                              | 9.57   | 14.14                     |
|                     |                                     |                                   | 30.97                                                              | 15.95  |                           |
|                     |                                     |                                   | 36.44                                                              | 17.13  |                           |
|                     |                                     |                                   | 40.40                                                              | 14.50  |                           |
|                     |                                     |                                   | 48.28                                                              | 13.57  |                           |

**Abbreviations:** 2θ (Bragg reflection, °), τ (crystallite size, nm), τ<sub>Average</sub> (average crystallite size, nm).

## 8. References

- (1) Mamakhel, A.; Yu, J.; Søndergaard-Pedersen, F.; Hald, P.; Iversen, B. B. Facile Synthesis of Brookite TiO<sub>2</sub> nanoparticles. *Chem. Commun.* **2020**, *56* (95), 15084–15087. <https://doi.org/10.1039/d0cc06795d>.
- (2) Murugesan, S.; Kuppusami, P.; Mohandas, E. Rietveld X-Ray Diffraction Analysis of Nanostructured Rutile Films of Titania Prepared by Pulsed Laser Deposition. *Mater. Res. Bull.* **2010**, *45* (1), 6–9. <https://doi.org/10.1016/j.materresbull.2009.09.012>.
- (3) Djerdj, I.; Tonejc, A. M. Structural Investigations of Nanocrystalline TiO<sub>2</sub> Samples. *J. Alloys Compd.* **2006**, *413* (1–2), 159–174. <https://doi.org/10.1016/j.jallcom.2005.02.105>.
- (4) Kolesnik, I. V.; Kozlov, D. A.; Poluboyarinov, A. S.; Garshev, A. V.; Ivanov, V. K. Non-Classical Growth of Brookite Nanorods. *CrystEngComm* **2019**, *21* (37), 5673–5681. <https://doi.org/10.1039/c9ce00682f>.
- (5) Pottier, A.; Chanéac, C.; Tronc, E.; Mazerolles, L.; Jolivet, J. P. Synthesis of Brookite TiO<sub>2</sub> Nanoparticles by Thermolysis of TiCl<sub>4</sub> in Strongly Acidic Aqueous Media. *J. Mater. Chem.* **2001**, *11* (4), 1116–1121. <https://doi.org/10.1039/b100435m>.
